# Supplementary material
Source: MDPI journal article supplement (https://www.mdpi.com/2071-1050/13/17/9651)
Supplement: s1 [file s1]

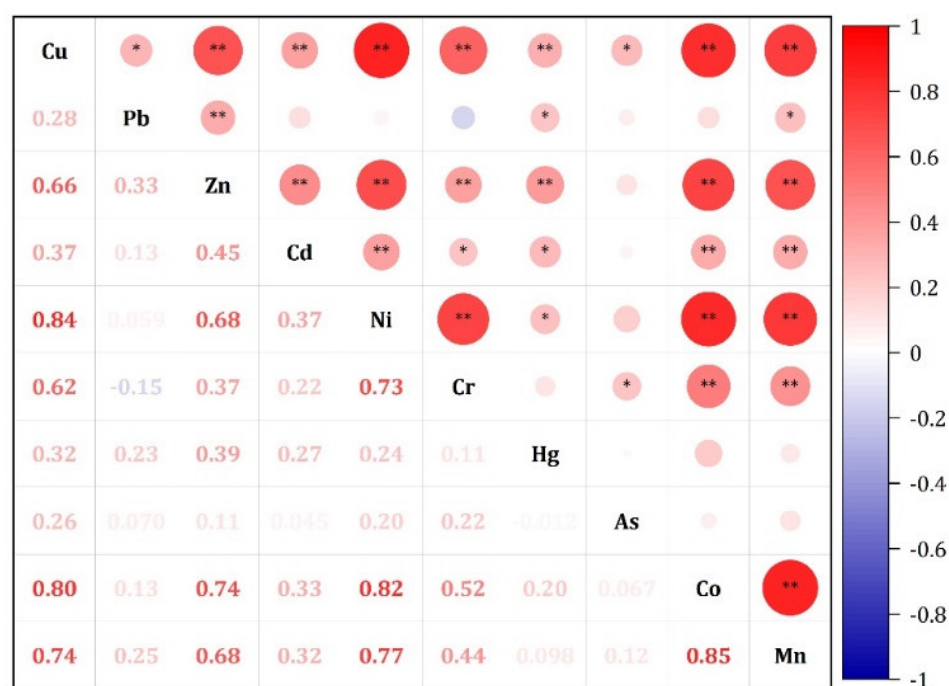

**Figure S1.** Pearson correlation analysis of HMs in soil.

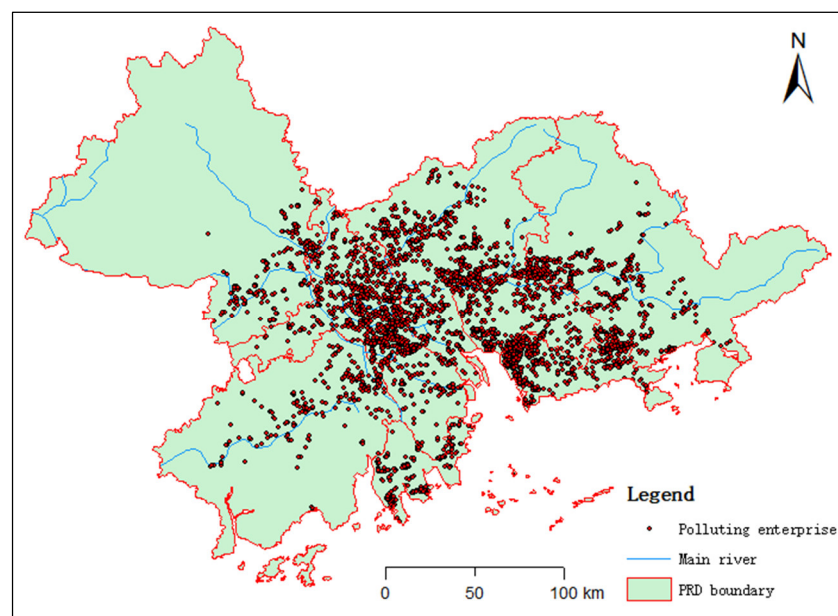

**Figure S2.** Spatial distribution of 1904 enterprises associated with surface treatment of metals and manufacturing in PRD.

**Table S1.** Statistic description information of quality control of soil HMs.

| HMs | Parallel samples     |                      | Laboratory controlling samples |                      | Minimum detection Limit |
|-----|----------------------|----------------------|--------------------------------|----------------------|-------------------------|
|     | Absolute deviation % | Qualification rate % | Recovery rate %                | Qualification rate % | mg/kg                   |
| Cu  | 0–9.1                | 100                  | 90–102                         | 100                  | 0.003                   |
| Pb  | 0.8–13.5             | 100                  | 87–110                         | 100                  | 0.001                   |
| Zn  | 0.4–10.0             | 100                  | 90–120                         | 100                  | 0.003                   |
| Cd  | 0–6.7                | 100                  | 84–110                         | 100                  | 0.0015                  |
| Ni  | 0–18.0               | 100                  | 80–120                         | 100                  | 0.0025                  |
| Cr  | 0–10.0               | 100                  | 84–111                         | 100                  | 0.01                    |
| Hg  | 0.4–7.1              | 100                  | 88–106                         | 100                  | 0.002                   |
| As  | 0.3–1.4              | 100                  | 92–105                         | 100                  | 0.003                   |
| Co  | 0.3–9.0              | 100                  | 90–103                         | 100                  | 0.005                   |
| Mn  | 0.3–9.0              | 100                  | 84–104                         | 100                  | 0.001                   |
| pH  | 0.01–0.27            | 100                  | /                              | /                    | /                       |

**Table S2.** Geo-accumulation Index and pollution levels.

| Contamination level               | $I_{geo}$ Value      |
|-----------------------------------|----------------------|
| Unpolluted                        | $I_{geo} \leq 0$     |
| Unpolluted to moderately polluted | $0 < I_{geo} \leq 1$ |
| Moderately polluted               | $1 < I_{geo} \leq 2$ |
| Moderately to heavily polluted    | $2 < I_{geo} \leq 3$ |
| Heavily polluted                  | $3 < I_{geo} \leq 4$ |
| Heavily to extremely polluted     | $4 < I_{geo} \leq 5$ |
| Extremely polluted                | $I_{geo} > 5$        |

**Table S3.** Total variance of HMs explained by PCA.

| Component | Initial eigenvalues |               |             | Extraction sums of squared loadings |               |             | Rotation sums of squared loadings |               |             |
|-----------|---------------------|---------------|-------------|-------------------------------------|---------------|-------------|-----------------------------------|---------------|-------------|
|           | Total               | % of variance | Cumulative% | Total                               | % of variance | Cumulative% | Total                             | % of variance | Cumulative% |
| 1         | 4.847               | 48.468        | 48.868      | 4.847                               | 48.468        | 48.468      | 4.426                             | 44.264        | 44.264      |
| 2         | 1.369               | 13.695        | 62.163      | 1.369                               | 13.695        | 62.163      | 1.743                             | 17.429        | 61.693      |
| 3         | 1.015               | 10.153        | 72.316      | 1.015                               | 10.153        | 72.316      | 1.062                             | 10.623        | 72.316      |
| 4         | 0.922               | 9.222         | 81.537      |                                     |               |             |                                   |               |             |
| 5         | 0.724               | 7.239         | 88.777      |                                     |               |             |                                   |               |             |
| 6         | 0.466               | 4.665         | 93.441      |                                     |               |             |                                   |               |             |
| 7         | 0.279               | 2.787         | 96.229      |                                     |               |             |                                   |               |             |
| 8         | 0.167               | 1.669         | 97.897      |                                     |               |             |                                   |               |             |
| 9         | 0.120               | 1.196         | 99.093      |                                     |               |             |                                   |               |             |
| 10        | 0.091               | 0.907         | 100.000     |                                     |               |             |                                   |               |             |

**Table S4.** Matrix of principal components analysis.

| Component | Component matrix |        |        | Rotated component matrix |              |              |
|-----------|------------------|--------|--------|--------------------------|--------------|--------------|
|           | PC1              | PC2    | PC3    | PC1                      | PC2          | PC3          |
| Cu        | 0.915            | -0.031 | 0.113  | <b>0.851</b>             | 0.294        | 0.200        |
| Pb        | 0.254            | 0.721  | 0.398  | -0.045                   | <b>0.821</b> | 0.261        |
| Zn        | 0.831            | 0.268  | -0.044 | <b>0.704</b>             | <b>0.518</b> | -0.023       |
| Cd        | 0.497            | 0.284  | -0.171 | <b>0.405</b>             | <b>0.400</b> | -0.181       |
| Ni        | 0.922            | -0.228 | -0.061 | <b>0.946</b>             | 0.084        | 0.072        |
| Cr        | 0.661            | -0.511 | -0.023 | <b>0.782</b>             | -0.259       | 0.144        |
| Hg        | 0.356            | 0.559  | -0.085 | 0.175                    | <b>0.623</b> | -0.167       |
| As        | 0.223            | -0.246 | 0.880  | 0.150                    | -0.007       | <b>0.929</b> |
| Co        | 0.900            | -0.086 | -0.158 | <b>0.895</b>             | 0.193        | -0.054       |
| Mn        | 0.856            | -0.044 | -0.042 | <b>0.824</b>             | 0.237        | 0.046        |

Note: significant loading factors are remarked in bold.

### Calculation of source apportionment contribution by PCA-MLR

**Table S5.** Contribution composition of soil HMs in PRD

| $B_i$ | $B_i / \sum B_i$ | contribution ratios |
|-------|------------------|---------------------|
| 0.864 | 0.643336         | 64.33%              |
| 0.333 | 0.247952         | 24.80%              |
| 0.146 | 0.108712         | 10.87%              |

**Table S6.** The factor score variables of source  $i$  at 80 sampling site

| $FS_1$   | $FS_2$   | $FS_3$   |
|----------|----------|----------|
| 1.59935  | -0.97522 | -0.57611 |
| -0.58927 | -0.17569 | -0.13999 |
| 0.35888  | -0.91572 | -0.01049 |
| -0.63309 | -0.03203 | -0.2231  |
| -0.56855 | -0.41329 | -0.23399 |
| 0.01301  | 0.02439  | -0.36446 |
| 0.23303  | -1.18341 | 0.5364   |
| -0.21159 | -0.55683 | -0.47919 |
| -0.73656 | -0.388   | -0.20532 |
| -0.68157 | -0.68829 | -0.36507 |
| -0.70573 | -0.83749 | -0.33256 |
| 0.20352  | -0.22494 | -0.27362 |
| -0.74366 | -0.69149 | -0.10914 |
| 0.41419  | -0.04575 | 0.25792  |
| 0.3352   | 0.02871  | -0.44512 |
| -0.19295 | -0.96929 | -0.67459 |
| 3.10929  | -0.30915 | -0.53833 |
| 0.6943   | -2.13327 | 0.10467  |
| 0.68871  | 2.82774  | -0.81545 |
| 0.37005  | 0.23339  | -0.11192 |
| 0.34248  | 0.80104  | -0.62255 |
| 0.68983  | 0.68155  | 1.11868  |
| -0.08633 | -0.58187 | -0.42384 |
| -0.3401  | 0.23472  | -0.34013 |

---

|          |          |          |
|----------|----------|----------|
| -0.19969 | 0.16781  | -0.48361 |
| -0.01385 | 1.52021  | -0.52085 |
| -0.22321 | -0.45298 | -0.86111 |
| -0.40772 | -0.59537 | -0.79129 |
| -0.55867 | 0.20155  | -0.05595 |
| -0.25283 | -0.74214 | 0.85345  |
| -0.14843 | 1.00515  | 0.06663  |
| -0.96479 | 0.33147  | 0.17081  |
| -0.34109 | 0.10276  | -0.64414 |
| 2.86174  | 0.23253  | 0.08164  |
| -0.83498 | 0.25237  | -0.45145 |
| 0.44031  | -0.94878 | 0.98972  |
| 2.60409  | 0.17252  | -0.19999 |
| -0.13281 | -0.41996 | -0.25429 |
| 2.32914  | 0.15039  | 0.53142  |
| -0.40922 | 1.64504  | -0.30789 |
| -1.5615  | 3.51419  | 2.85046  |
| 2.3062   | 0.05777  | 0.96728  |
| 3.57539  | 0.26188  | 0.54861  |
| 2.52806  | 2.51712  | 0.4644   |
| -0.20695 | -0.61737 | -0.36651 |
| -0.38455 | 1.85715  | -0.5131  |
| 0.50115  | 0.32955  | 0.39736  |
| -0.40594 | 1.51915  | -2.0581  |
| -0.20468 | 0.26051  | -0.03479 |
| -0.235   | 0.29476  | -0.16864 |
| -0.50863 | -0.02206 | -0.20607 |
| 0.13159  | -0.51676 | -0.31867 |
| -0.26074 | -1.18914 | -0.48439 |
| -0.08144 | -0.4937  | 0.73001  |
| -0.38685 | -0.21076 | -0.37915 |
| -0.30387 | 1.4737   | -0.68755 |
| -0.04721 | 0.84838  | -0.0184  |
| -0.70794 | -0.64628 | -0.64502 |
| -0.10908 | -0.69738 | -0.02907 |
| -0.11241 | -0.80925 | 0.6144   |
| -0.45091 | -0.46058 | -0.26724 |
| -0.74535 | 0.38924  | -0.7628  |
| -0.7611  | -0.78822 | -0.84504 |
| -0.06666 | -1.31658 | -0.59305 |
| -0.10908 | -0.69738 | -0.02907 |
| -0.69977 | 1.15503  | -0.6432  |
| -1.43805 | 2.74193  | 0.71731  |
| -0.20495 | -1.02519 | -0.00028 |
| -0.25031 | -0.15655 | 0.1785   |
| -0.24868 | -1.09505 | 5.31293  |
| -0.43242 | 0.25542  | -0.61207 |
| 0.33792  | 0.41083  | 0.40517  |
| 0.0292   | -1.63361 | -0.33177 |
| -0.89145 | 0.1431   | -0.27243 |
| -0.92195 | -0.24492 | 0.53467  |
| -0.676   | -0.05019 | -0.56624 |
| -1.0524  | -0.45116 | 4.43639  |

---

|          |          |          |
|----------|----------|----------|
| -0.80491 | -0.67332 | -0.11805 |
| -0.84303 | -0.37113 | -0.53552 |
| -0.60614 | -0.1955  | 0.4729   |

**Table S7.** Contributions of four sources in 80 sampling site

| Site | PC1      | PC2       | PC3      |
|------|----------|-----------|----------|
| 1    | 156.7625 | -13.5     | -0.89489 |
| 2    | -6.27614 | 9.4554284 | 4.595017 |
| 3    | 64.35515 | -11.79169 | 6.225173 |
| 4    | -9.54046 | 13.580072 | 3.548823 |
| 5    | -4.73263 | 2.6336588 | 3.411739 |
| 6    | 38.58998 | 15.199956 | 1.769373 |
| 7    | 54.98011 | -19.47737 | 13.10946 |
| 8    | 21.85868 | -1.48754  | 0.325143 |
| 9    | -17.2483 | 3.3597638 | 3.772639 |
| 10   | -13.1519 | -5.261908 | 1.761694 |
| 11   | -14.9517 | -9.545612 | 2.170932 |
| 12   | 52.7818  | 8.0414042 | 2.912873 |
| 13   | -17.7772 | -5.353784 | 4.983359 |
| 14   | 68.47541 | 13.186155 | 9.603937 |
| 15   | 62.59114 | 15.323988 | 0.754019 |
| 16   | 23.24724 | -13.32974 | -2.13457 |
| 17   | 269.2436 | 5.6236381 | -0.41932 |
| 18   | 89.34186 | -46.74895 | 7.674815 |
| 19   | 88.92544 | 95.687362 | -3.90772 |
| 20   | 65.18725 | 21.200586 | 4.948365 |
| 21   | 63.13346 | 37.498471 | -1.47948 |
| 22   | 89.00888 | 34.067776 | 20.43925 |
| 23   | 31.18977 | -2.206467 | 1.021893 |
| 24   | 12.28548 | 21.238772 | 2.075641 |
| 25   | 22.74515 | 19.317709 | 0.269504 |
| 26   | 36.58908 | 58.14667  | -0.19928 |
| 27   | 20.99306 | 1.4941132 | -4.48249 |
| 28   | 7.248207 | -2.594068 | -3.60359 |
| 29   | -3.99663 | 20.286423 | 5.652919 |
| 30   | 18.78655 | -6.808003 | 17.10051 |
| 31   | 26.5637  | 43.358705 | 7.195965 |
| 32   | -34.2501 | 24.016576 | 8.50739  |
| 33   | 12.21173 | 17.450049 | -1.75126 |
| 34   | 250.8027 | 21.175895 | 7.384912 |
| 35   | -24.58   | 21.745524 | 0.674336 |
| 36   | 70.42118 | -12.74088 | 18.81589 |
| 37   | 231.6094 | 19.452938 | 3.839733 |
| 38   | 27.7273  | 2.4421554 | 3.156201 |
| 39   | 211.1273 | 18.817561 | 13.04678 |
| 40   | 7.136467 | 61.730683 | 2.48148  |
| 41   | -78.7012 | 115.39613 | 42.23902 |
| 42   | 209.4184 | 16.158334 | 18.53341 |
| 43   | 303.9652 | 22.018567 | 13.26316 |
| 44   | 225.9456 | 86.769105 | 12.20312 |

---

|    |          |           |          |
|----|----------|-----------|----------|
| 45 | 22.20433 | -3.225713 | 1.743567 |
| 46 | 8.974229 | 67.820606 | -0.10172 |
| 47 | 74.95339 | 23.961451 | 11.35922 |
| 48 | 7.380806 | 58.116237 | -19.5503 |
| 49 | 22.37343 | 21.979233 | 5.919283 |
| 50 | 20.11478 | 22.96259  | 4.234369 |
| 51 | -0.26896 | 13.866323 | 3.763198 |
| 52 | 47.42346 | -0.337084 | 2.345781 |
| 53 | 18.19731 | -19.64189 | 0.259685 |
| 54 | 31.55404 | 0.3249951 | 15.54664 |
| 55 | 8.802893 | 8.4485283 | 1.584454 |
| 56 | 14.98439 | 56.811315 | -2.29771 |
| 57 | 34.10397 | 38.857657 | 6.125601 |
| 58 | -15.1163 | -4.055752 | -1.76234 |
| 59 | 29.49504 | -5.522892 | 5.991286 |
| 60 | 29.24697 | -8.734809 | 14.09133 |
| 61 | 4.03082  | 1.2759084 | 2.993185 |
| 62 | -17.9031 | 25.675219 | -3.24496 |
| 63 | -19.0764 | -8.131013 | -4.2802  |
| 64 | 32.65506 | -23.30084 | -1.10813 |
| 65 | 29.49504 | -5.522892 | 5.991286 |
| 66 | -14.5077 | 47.661932 | -1.73943 |
| 67 | -69.505  | 93.223658 | 15.38677 |
| 68 | 22.35331 | -14.93469 | 6.353697 |
| 69 | 18.97428 | 10.00496  | 8.604193 |
| 70 | 19.0957  | -16.94046 | 73.23677 |
| 71 | 5.40821  | 21.833093 | -1.34756 |
| 72 | 62.79376 | 26.295093 | 11.45753 |
| 73 | 39.79604 | -32.40313 | 2.180877 |
| 74 | -28.7867 | 18.608256 | 2.927853 |
| 75 | -31.0587 | 7.4677554 | 13.08769 |
| 76 | -12.737  | 13.058678 | -0.77065 |
| 77 | -40.7765 | 1.5463675 | 62.20282 |
| 78 | -22.34   | -4.832102 | 4.8712   |
| 79 | -25.1797 | 3.8441209 | -0.38394 |
| 80 | -7.53285 | 8.8866605 | 12.31012 |

---
